# Supplementary material for: Photomechanical motion of diarylethene molecular crystal nanowires
Source: Royal Society of Chemistry journal article supplement (doi:10.1039/c7nr09571f), 2018-01-01
Supplement: c7nr09571f1.pdf [file c7nr09571f1.pdf]

## Supplementary Information

### Photomechanical motion of diarylethene molecular crystal nanowires

Fei Tong,<sup>a</sup> Daichi Kitagawa,<sup>a,b</sup> Xinning Dong,<sup>a</sup> Seiya Kobatake,<sup>\*b</sup> Christopher J. Bardeen<sup>\*a</sup>

<sup>a</sup>*Department of Chemistry, University of California, 501 Big Springs Road, Riverside, CA 92521, USA.*

<sup>b</sup>*Department of Applied Chemistry, Graduate School of Engineering, Osaka City University, 3-3-138 Sugimoto, Sumiyoshi-ku, Osaka 558-8585, Japan.*

\* E-mail: [christopher.bardeen@ucr.edu](mailto:christopher.bardeen@ucr.edu)

\* E-mail: [kobatake@a-chem.eng.osaka-cu.ac.jp](mailto:kobatake@a-chem.eng.osaka-cu.ac.jp)

**Figure S1.** Optical microscopy images the bundle of DAE nanowires under alternative UV and visible light irradiation.

**Figure S2.** Photographs of AAO template containing DAE nanowires before and after UV light irradiation.

**Figure S3.** Cross polarized microscopy images of single DAE nanowire before and after UV light irradiation.

**Figure S4.** Flowchart of making DAE nanowires by using AAO template method.

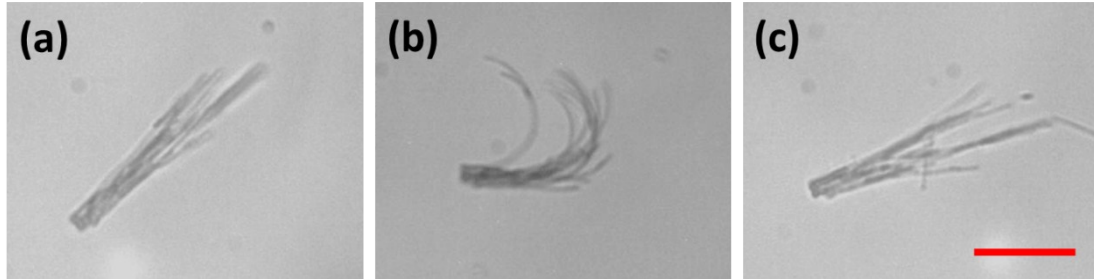

**Figure S1.** Optical microscopy images the bundle of DAE nanowires. (a) DAE nanowires before light irradiation; (b) DAE nanowires after UV light irradiation and (c) DAE nanowires after visible light irradiation. Scale bar: 30  $\mu\text{m}$

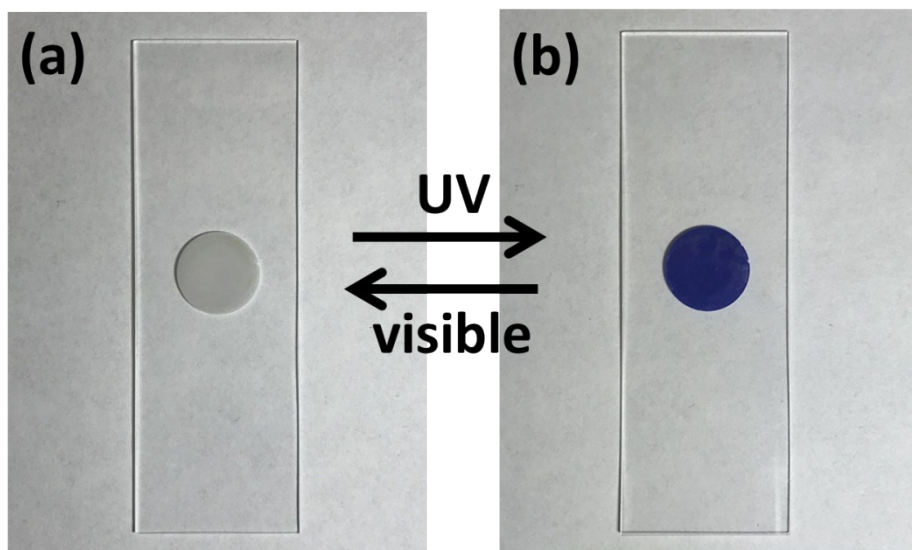

**Figure S2.** Photographs of (a) AAO template containing DAE nanowires before UV light irradiation and (b) AAO template containing DAE nanowires after UV light irradiation, diameter of the template is 13 mm.

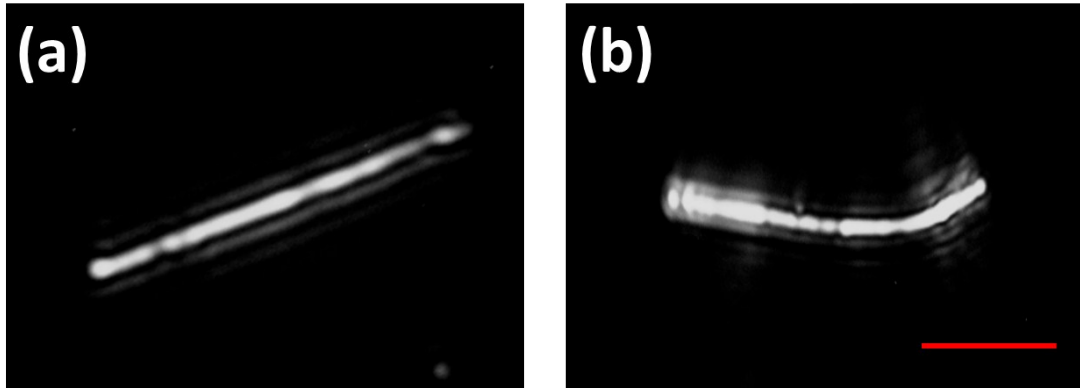

**Figure S3.** Cross polarized microscopy images of (a) a single DAE nanowire before UV light irradiation and (b) a single DAE nanowire after UV light irradiation. Scale bar: 20  $\mu\text{m}$

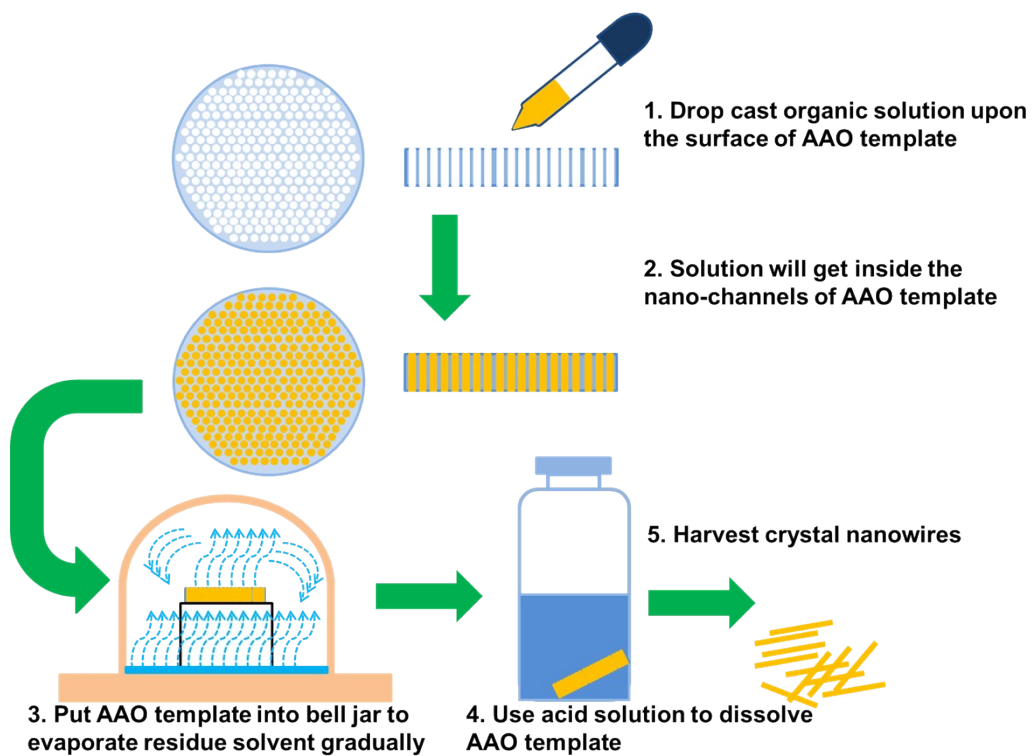

**Figure S4.** Flowchart of making DAE nanowires by using AAO template method.
